# Supplementary material
Source: MDPI journal article supplement (https://www.mdpi.com/2071-1050/14/23/16313)
Supplement: s1 [file s1 › sustainability-2000072-supplementary.pdf]

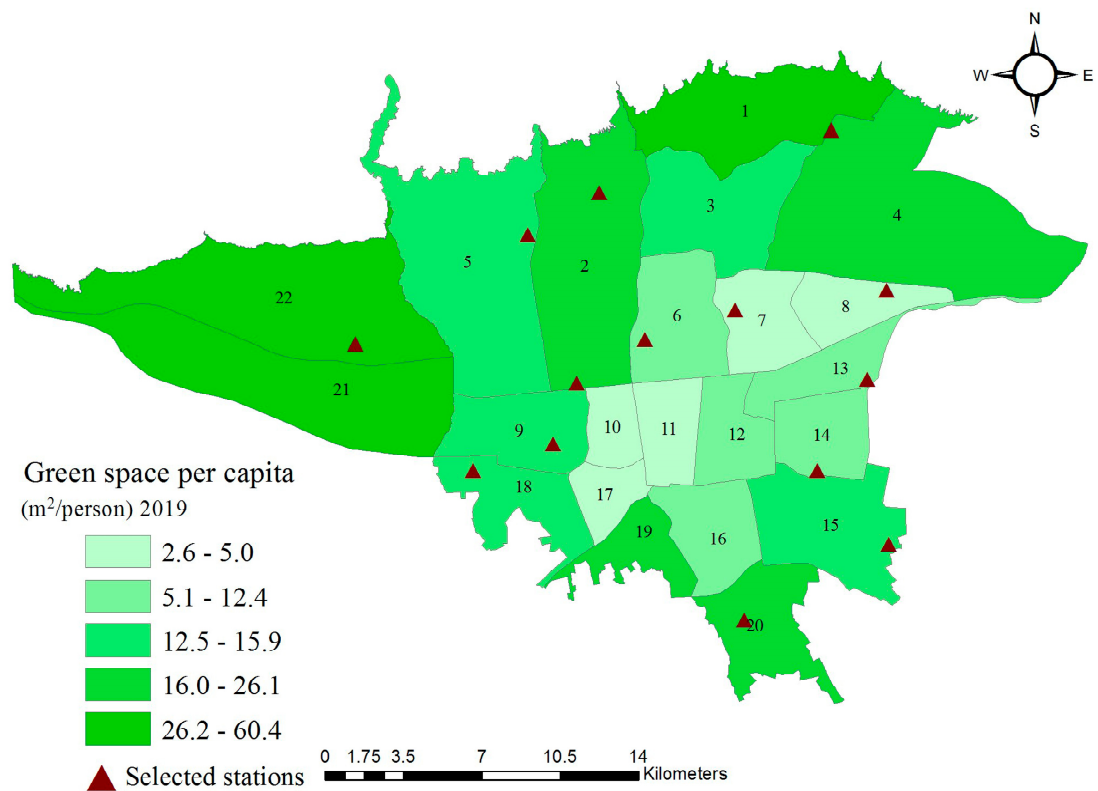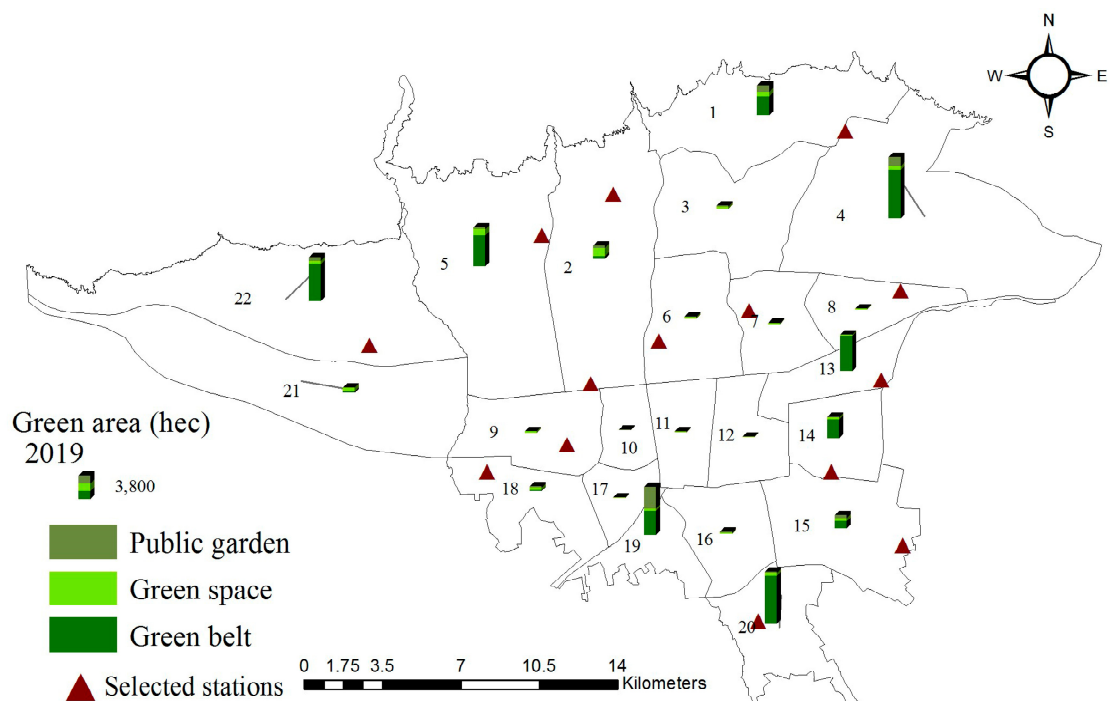

Figure S1. Green space and green area per capita across Tehran.

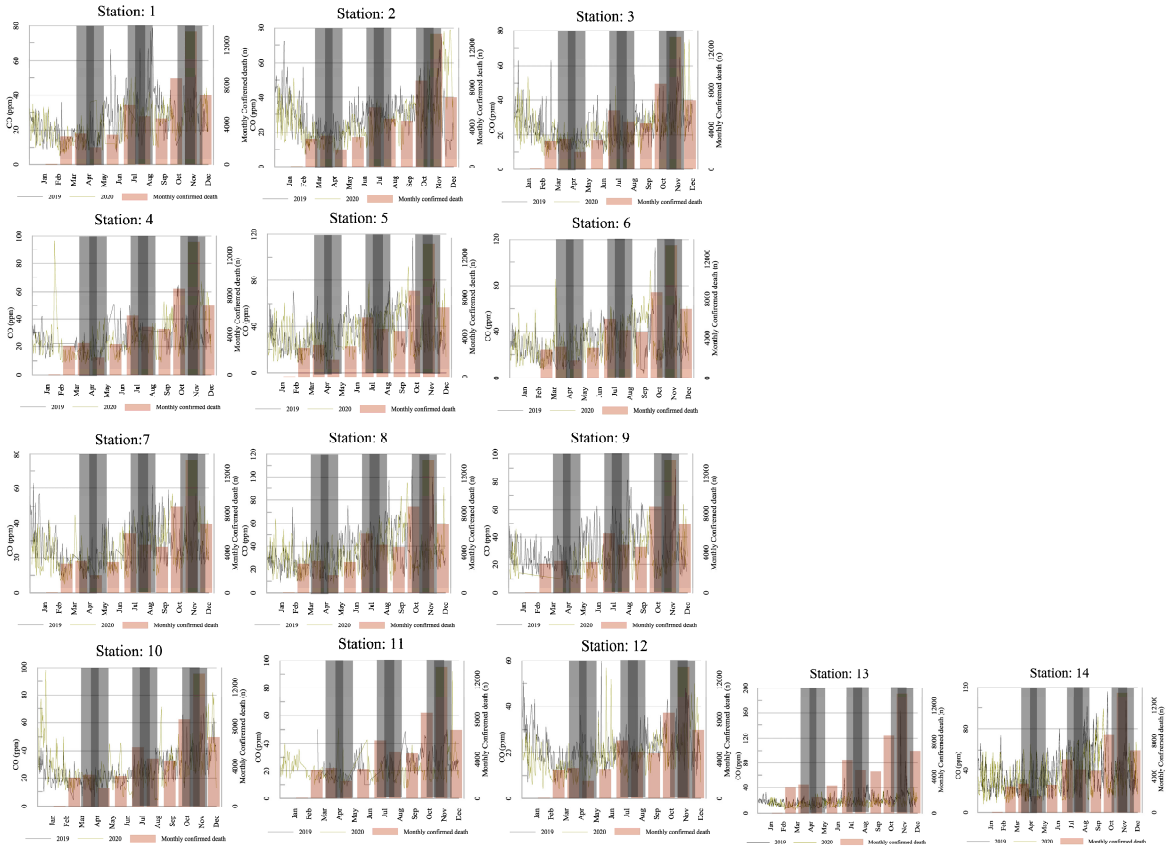

**Figure S2.** Temporal distribution of CO content at each station, gray rectangular shows strict lockdown period.

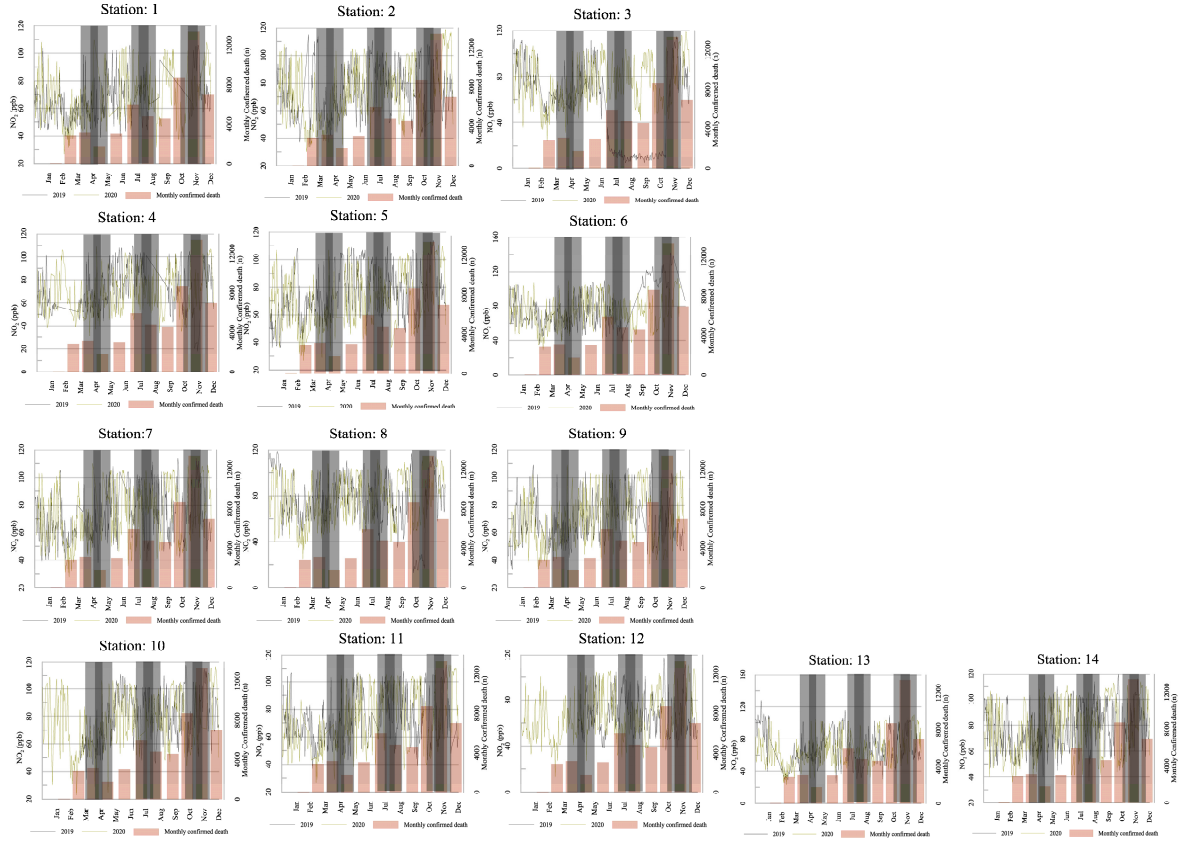

**Figure S3.** Temporal distribution of NO<sub>2</sub> content in all investigated station, gray rectangular shows strict lockdown period.

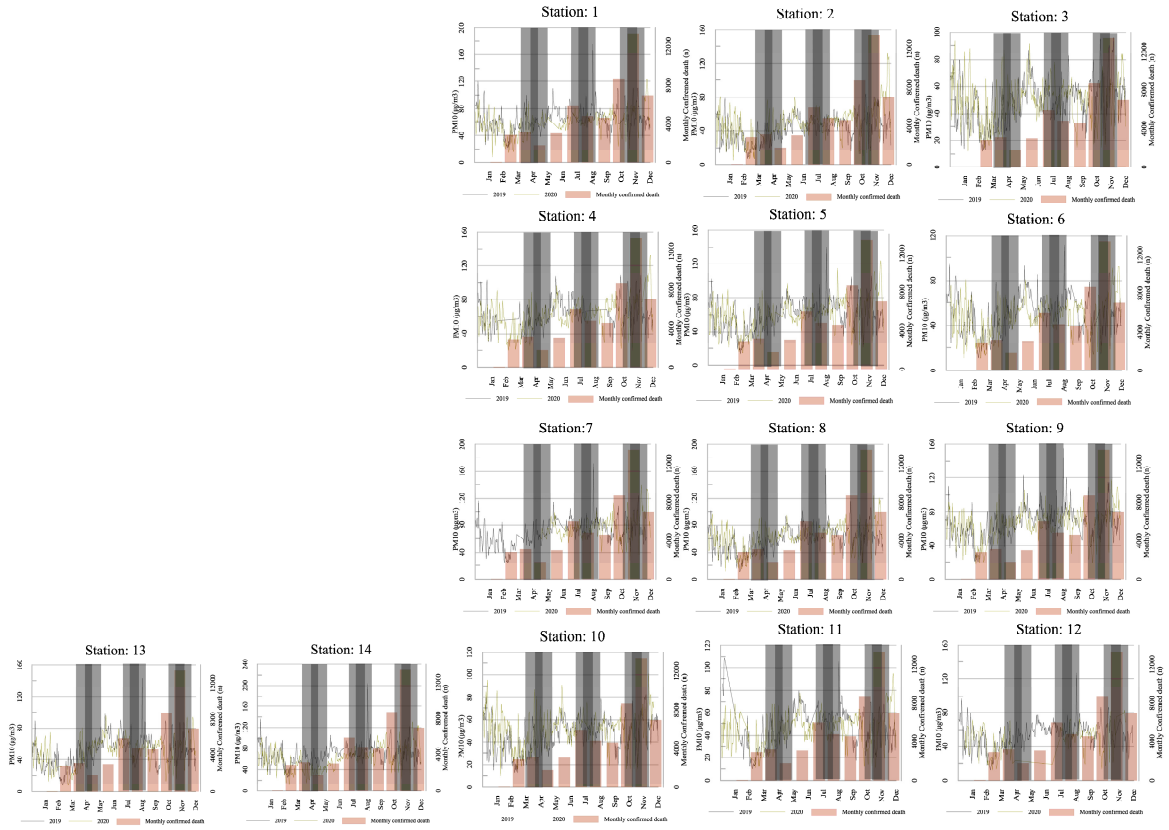

**Figure S4.** Temporal distribution of PM<sub>10</sub> content in all investigated station, gray rectangular shows strict lockdown period.

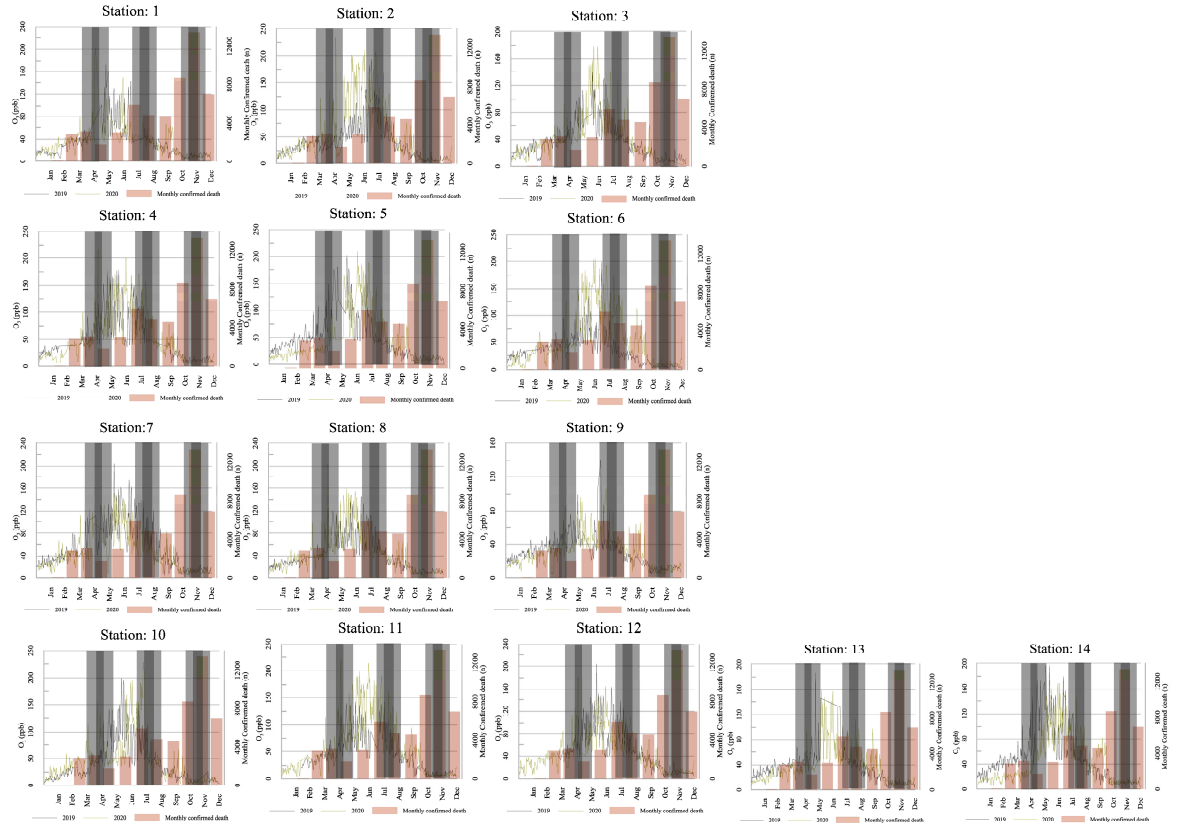

**Figure S5.** Temporal distribution of O3 content in all investigated station, gray rectangular shows strict lockdown period.

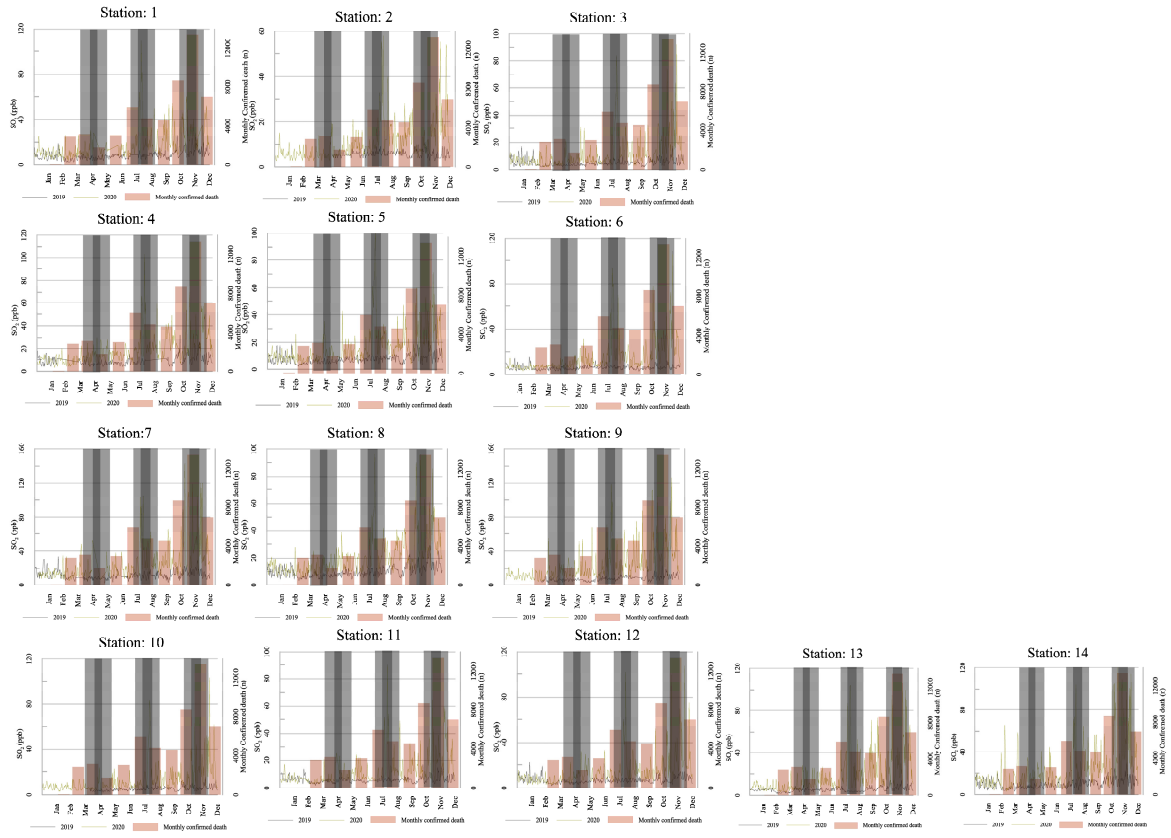

**Figure S6.** Temporal distribution of SO<sub>2</sub> content in all investigated station, gray rectangular shows strict lockdown period.

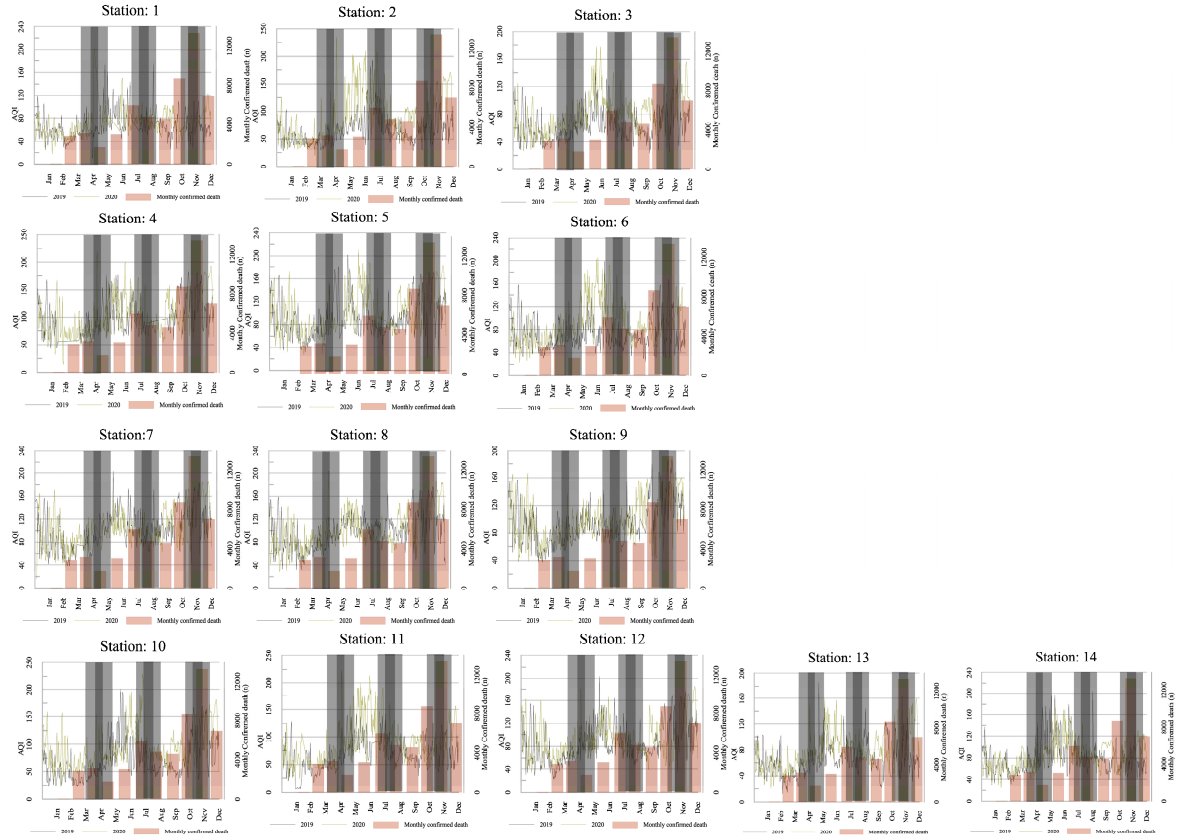

**Figure S7.** Temporal distribution of the AQI indices in all investigated stations, the gray rectangles show strict lockdown periods.
